# Supplementary material
Source: MDPI journal article supplement (https://www.mdpi.com/2079-9284/10/2/50)
Supplement: s1 [file s1]

| Study 1   |            |       |        |              | Study 2   |            |       |        |              |
|-----------|------------|-------|--------|--------------|-----------|------------|-------|--------|--------------|
| Volunteer | Ingredient | D0 t0 | D0 t3h | $\Delta\log$ | Volunteer | Ingredient | D0 t0 | D0 t5h | $\Delta\log$ |
| GT052     | PHY        | 530   | 240    | -0.3         | GT052     | CHX        | 341   | 1      | -2.4         |
| GT052     | CHX        | 1130  | 3      | -2.6         | GT052     | PHY        | 118   | 241    | 0.3          |
| GT053     | PHY        | 164   | 72     | -0.4         | GT053     | CHX        | 369   | 1      | -2.4         |
| GT053     | CHX        | 405   | 4      | -2.0         | GT053     | PHY        | 305   | 76     | -0.6         |
| GT055     | PHY        | 1548  | 879    | -0.2         | GT054     | CHX        | 28656 | 1270   | -1.4         |
| GT055     | CHX        | 1437  | 140    | -1.0         | GT054     | PHY        | 27576 | 8928   | -0.5         |
| GT056     | PHY        | 8820  | 3564   | -0.4         | GT055     | CHX        | 1493  | 39     | -1.6         |
| GT056     | CHX        | 11952 | 1      | -3.9         | GT055     | PHY        | 348   | 639    | 0.3          |
| GT057     | PHY        | 263   | 236    | 0.0          | GT056     | CHX        | 7416  | 7      | -3.0         |
| GT057     | CHX        | 65    | 1      | -1.7         | GT056     | PHY        | 3168  | 977    | -0.5         |
| GT058     | PHY        | 2232  | 879    | -0.4         | GT058     | CHX        | 192   | 1      | -2.1         |
| GT058     | CHX        | 497   | 3      | -2.2         | GT058     | PHY        | 46    | 59     | 0.1          |

**Table S1** Bacterial densities (CFU/cm<sup>2</sup>) measured on the neck in the 6 volunteers, at the initial sampling time (D0 t0) and after 3 h (D0 t3h, Study 1) or 5 h (D0 t5h, Study 2), after a single topical application of physiological saline (PHY) or chlorhexidine (CHX).  $\Delta\log = \log (\text{D0 t3h}) - \log (\text{D0 t0})$  or  $\Delta\log = \log (\text{D0 t5h}) - \log (\text{D0 t0})$

| Volunteer | Study | Left  | Right | Mean  | Lateralization factor |
|-----------|-------|-------|-------|-------|-----------------------|
| GT052     | 1     | 530   | 1130  | 830   | 2.1                   |
| GT053     | 1     | 164   | 405   | 285   | 2.5                   |
| GT055     | 1     | 1548  | 1437  | 1493  | 1.1                   |
| GT056     | 1     | 8820  | 11952 | 10386 | 1.4                   |
| GT057     | 1     | 263   | 65    | 164   | 4.0                   |
| GT058     | 1     | 2232  | 497   | 1365  | 4.5                   |
| GT052     | 2     | 341   | 118   | 230   | 2.9                   |
| GT053     | 2     | 369   | 305   | 337   | 1.2                   |
| GT054     | 2     | 28656 | 27576 | 28116 | 1.0                   |
| GT055     | 2     | 1493  | 348   | 921   | 4.3                   |
| GT056     | 2     | 7146  | 3168  | 5157  | 2.3                   |
| GT058     | 2     | 192   | 46    | 119   | 4.2                   |
| GT055     | 3     | 2146  | 230   | 1188  | <b><u>9.3</u></b>     |
| GT056     | 3     | 17138 | 7178  | 12158 | 2.4                   |
| GT058     | 3     | 119   | 230   | 175   | 1.9                   |
| GT060     | 3     | 10841 | 11914 | 11378 | 1.1                   |
| GT061     | 3     | 8695  | 1047  | 4871  | <b><u>8.3</u></b>     |
| GT062     | 3     | 518   | 2923  | 1721  | 5.6                   |
| GT063     | 3     | 372   | 230   | 301   | 1.6                   |
| GT052     | 4     | 1391  | 1563  | 1477  | 1.1                   |
| GT053     | 4     | 789   | 165   | 477   | 4.8                   |
| GT055     | 4     | 559   | 3959  | 2259  | <b><u>7.1</u></b>     |
| GT056     | 4     | 4662  | 8732  | 6697  | 1.9                   |
| GT064     | 4     | 6919  | 2035  | 4477  | 3.4                   |

**Table S2** Compiled bacterial density values (CFU/cm<sup>2</sup>) recorded in studies 1 to 4 at the initial sampling time (D0 t0) for samples harvested on the right or left side of the neck. The lateralization factor is the ratio between the highest and the lowest bacterial densities measured, between the left and right sides.

| Study | Volunteer | Treatment            | D0 t0 | D0 t5h | Ratio<br>D0 t5h/D0 t0 | Δlog             |
|-------|-----------|----------------------|-------|--------|-----------------------|------------------|
| 3     | GT056     | Physiological saline | 17138 | 1      | 0.0                   | -4.1             |
| 3     | GT063     | Physiological saline | 372   | 489    | 1.3                   | 0.1              |
| 3     | GT060     | Physiological saline | 10841 | 9805   | 0.9                   | 0.0              |
| 3     | GT062     | Physiological saline | 518   | 275    | 0.5                   | -0.3             |
| 3     | GT061     | Physiological saline | 8695  | 3589   | 0.4                   | -0.4             |
| 3     | GT055     | Physiological saline | 2146  | 746    | 0.3                   | -0.5             |
| 3     | GT058     | Physiological saline | 119   | 131    | 1.1                   | 0.0              |
|       |           |                      |       |        |                       | <b>Mean -0.7</b> |
| 3     | GT056     | Chlorhexidine        | 7178  | 7      | 0.0                   | -3.0             |
| 3     | GT063     | Chlorhexidine        | 230   | 3      | 0.0                   | -1.9             |
| 3     | GT060     | Chlorhexidine        | 11914 | 193    | 0.0                   | -1.8             |
| 3     | GT062     | Chlorhexidine        | 2923  | 12     | 0.0                   | -2.4             |
| 3     | GT061     | Chlorhexidine        | 1047  | 13     | 0.0                   | -1.9             |
| 3     | GT055     | Chlorhexidine        | 230   | 37     | 0.2                   | -0.8             |
| 3     | GT058     | Chlorhexidine        | 230   | 1      | 0.0                   | -2.2             |
|       |           |                      |       |        |                       | <b>Mean -2.0</b> |
| 4     | GT052     | Physiological saline | 1563  | 576    | 0.4                   | -0.4             |
| 4     | GT053     | Physiological saline | 165   | 206    | 1.2                   | 0.1              |
| 4     | GT055     | Physiological saline | 3959  | 5143   | 1.3                   | 0.1              |
| 4     | GT056     | Physiological saline | 8732  | 3330   | 0.4                   | -0.4             |
| 4     | GT064     | Physiological saline | 2035  | 1822   | 0.9                   | 0.0              |
|       |           |                      |       |        |                       | <b>Mean -0.1</b> |
| 4     | GT052     | Chlorhexidine        | 1391  | 158    | 0.1                   | -0.9             |
| 4     | GT053     | Chlorhexidine        | 789   | 10     | 0.0                   | -1.9             |
| 4     | GT055     | Chlorhexidine        | 559   | 1517   | <u>2.7</u>            | 0.4              |
| 4     | GT056     | Chlorhexidine        | 4662  | 3      | 0.0                   | -3.2             |
| 4     | GT064     | Chlorhexidine        | 6919  | 28     | 0.0                   | -2.4             |
|       |           |                      |       |        |                       | <b>Mean -1.6</b> |

**Table S3** Compiled bacterial density values (CFU/cm<sup>2</sup>) for studies 3 and 4 at the initial sampling time (D0 t0) and the short-term sampling time (D0 t5h) after topical application of physiological saline or chlorhexidine. The Δlog value was calculated as log (D0 t0) – log (D0 t5h).

| Study 3   |       |            |       |        |      |      |      |      |
|-----------|-------|------------|-------|--------|------|------|------|------|
| Volunteer | Side  | Ingredient | D0 t0 | D0 t5h | D1   | D2   | D3   | D7   |
| GT056     | Left  | PHY        | 17138 | 1      | 6623 | 7770 | 7844 | 5254 |
|           | Right | CHX        | 7178  | 7      | 243  | 131  | 1147 | 1018 |
| GT063     | Left  | PHY        | 372   | 489    | 379  | 292  | 1076 | 1233 |
|           | Right | CHX        | 230   | 3      | 68   | 321  | 197  | 248  |
| GT060     | Left  | PHY        | 10841 | 9805   | 8066 | 6845 | 5106 | 3811 |
|           | Right | CHX        | 11914 | 193    | 2220 | 3256 | 3478 | 5328 |
| GT062     | Left  | PHY        | 518   | 275    | 511  | 328  | 1018 | 688  |
|           | Right | CHX        | 2923  | 12     | 394  | 1348 | 588  | 990  |
| GT061     | Left  | PHY        | 8695  | 3589   | 7659 | 7215 | 3959 | 5513 |
|           | Right | CHX        | 1047  | 13     | 1162 | 2072 | 1554 | 1776 |
| GT055     | Left  | PHY        | 2146  | 746    | 3256 | 2331 | 4329 | 3034 |
|           | Right | CHX        | 230   | 37     | 365  | 860  | 628  | 173  |
| GT058     | Left  | PHY        | 119   | 131    | 139  | 1004 | 645  | 875  |
|           | Right | CHX        | 230   | 1      | 37   | 124  | 90   | 178  |

**Table S4** Bacterial densities (CFU/cm<sup>2</sup>) from Study 3, right and left sides of the neck for the 7 volunteers, at the initial sampling time (D0 t0), 5 h (D0 t5h), 1 day (D1), 2 days (D2), 3 days (D3), and 7 days (D7) after a single topical application to the neck of physiological saline (PHY) on the left side, or chlorhexidine (CHX) on the right side.

| Study 4   |       |            |       |        |      |      |      |      |
|-----------|-------|------------|-------|--------|------|------|------|------|
| Volunteer | Side  | Ingredient | D0 t0 | D0 t5h | D1   | D2   | D3   | D7   |
| GT052     | Left  | CHX        | 1391  | 158    | 98   | 86   | 46   | 717  |
|           | Right | PHY        | 1563  | 576    | 1369 | 635  | 946  | 1517 |
| GT053     | Left  | CHX        | 789   | 10     | 16   | 30   | 71   | 645  |
|           | Right | PHY        | 165   | 206    | 123  | 379  | 148  | 401  |
| GT055     | Left  | CHX        | 559   | 1517   | 860  | 2664 | 423  | 2738 |
|           | Right | PHY        | 3959  | 5143   | 2279 | 5143 | 5439 | 4366 |
| GT056     | Left  | CHX        | 4662  | 3      | 559  | 55   | 77   | 3219 |
|           | Right | PHY        | 8732  | 3330   | 6068 | 2627 | 1241 | 8288 |
| GT064     | Left  | CHX        | 6919  | 28     | 918  | 102  | 635  | 2368 |
|           | Right | PHY        | 2035  | 1822   | 3374 | 3885 | 4773 | 4921 |

**Table S5** Bacterial densities (CFU/cm<sup>2</sup>) from Study 4, right and left sides of the neck for the 7 volunteers, at the initial sampling time (D0 t0), 5 h (D0 t5h), 1 day (D1), 2 days (D2), 3 days (3D), and 7 days (D7) after three days of twice-daily topical application (from D0 to D2) of physiological saline (PHY) to the right side or chlorhexidine (CHX) to the left side of the neck.

| Volunteer    | Side  | Ingredient | D0 t0 | D0 t5h | D1    | D2    | D3    | D7    |
|--------------|-------|------------|-------|--------|-------|-------|-------|-------|
| Volunteer 1  | Right | CHX        | 34    | 0      | 0     | 16    | 123   | 50    |
|              | Left  | PHY        | 38    | 30     | 16    | 10    | 145   | 67    |
| Volunteer 2  | Right | CHX        | 1021  | 116    | 153   | 312   | 134   | 1006  |
|              | Left  | PHY        | 1317  | 696    | 622   | 58    | 253   | 407   |
| Volunteer 3  | Right | CHX        | 77    | 0      | 7     | 24    | 2     | 29    |
|              | Left  | PHY        | 53    | 30     | 32    | 21    | 34    | 32    |
| Volunteer 5  | Right | CHX        | 3315  | 297    | 6808  | 881   | 1110  | 2131  |
|              | Left  | PHY        | 7252  | 12062  | 10804 | 9398  | 8140  | 6586  |
| Volunteer 6  | Right | CHX        | 2868  | 141    | 1162  | 2290  | 213   | 2209  |
|              | Left  | PHY        | 6290  | 2287   | 1317  | 2383  | 555   | 2490  |
| Volunteer 7  | Right | CHX        | 190   | 107    | 369   | 271   | 81    | 394   |
|              | Left  | PHY        | 287   | 511    | 276   | 227   | 277   | 3086  |
| Volunteer 8  | Right | CHX        | 1147  | 182    | 173   | 424   | 162   | 866   |
|              | Left  | PHY        | 425   | 614    | 1103  | 3596  | 1687  | 1558  |
| Volunteer 9  | Right | CHX        | 238   | 481    | 254   | 50    | 162   | 5     |
|              | Left  | PHY        | 306   | 371    | 472   | 102   | 807   | 13    |
| Volunteer 10 | Right | CHX        | 117   | 121    | 236   | 61    | 89    | 166   |
|              | Left  | PHY        | 107   | 167    | 81    | 192   | 78    | 90    |
| Volunteer 11 | Right | CHX        | 3663  | 525    | 1798  | 4048  | 918   | 27    |
|              | Left  | PHY        | 8288  | 2967   | 9398  | 3115  | 6438  | 22200 |
| Volunteer 12 | Right | CHX        | 6808  | 1147   | 6216  | 9620  | 1117  | 17242 |
|              | Left  | PHY        | 205   | 4477   | 13024 | 13912 | 13024 | 23162 |

**Table S6** Bacterial densities (CFU/cm<sup>2</sup>) from Study 5, right and left sides of the neck for the 12 volunteers, at each sampling time: D0 Day 0 Initial point, D0 t5h Short-term sampling after 5 h, and D1, D2, D3 and D7, sampling after 1 day, 2 days, 3 days, and 7 days, respectively. Topical applications were performed twice-daily over three days (from D0 to D2); applying physiological saline (PHY) to the left side and chlorhexidine (CHX) to the right side of the neck.

| Volunteer    | Side  | Ingredient | D0 t0 | D0 t0+5h | D1   | D2   | D3   | D7    |
|--------------|-------|------------|-------|----------|------|------|------|-------|
| Volunteer 1  | Right | none       | 54    | -        | -    | -    | -    | -     |
|              | Left  | CHX        | 67    | 3        | 171  | 64   | 17   | 315   |
| Volunteer 2  | Right | none       | 2990  | -        | -    | -    | -    | -     |
|              | Left  | CHX        | 6586  | 7        | 16   | 77   | 13   | 252   |
| Volunteer 3  | Right | none       | 144   | -        | -    | -    | -    | -     |
|              | Left  | CHX        | 2324  | 24       | 201  | 18   | 65   | 65    |
| Volunteer 4  | Right | none       | 5550  | -        | -    | -    | -    | -     |
|              | Left  | CHX        | 3763  | 784      | 718  | 784  | 248  | 1295  |
| Volunteer 5  | Right | none       | 8288  | -        | -    | -    | -    | -     |
|              | Left  | CHX        | 3471  | 0        | 107  | 67   | 229  | 15540 |
| Volunteer 6  | Right | none       | 367   | -        | -    | -    | -    | -     |
|              | Left  | CHX        | 129   | 23       | 16   | 36   | 27   | 75    |
| Volunteer 7  | Right | none       | 407   | -        | -    | -    | -    | -     |
|              | Left  | CHX        | 228   | 6        | 71   | 16   | 14   | 147   |
| Volunteer 8  | Right | none       | 6364  | -        | -    | -    | -    | -     |
|              | Left  | CHX        | 10952 | 8658     | 4440 | 1817 | 3426 | 6882  |
| Volunteer 9  | Right | none       | 548   | -        | -    | -    | -    | -     |
|              | Left  | CHX        | 1214  | 6        | 10   | 48   | 73   | 243   |
| Volunteer 10 | Right | none       | 222   | -        | -    | -    | -    | -     |
|              | Left  | CHX        | 629   | 11       | 940  | 636  | 371  | 1014  |
| Volunteer 11 | Right | none       | 282   | -        | -    | -    | -    | -     |
|              | Left  | CHX        | 740   | 607      | 0    | 30   | 0    | 2     |
| Volunteer 12 | Right | none       | 23014 | -        | -    | -    | -    | -     |
|              | Left  | CHX        | 26196 | 7252     | 8658 | 1332 | 1214 | 7844  |

**Table S7** Bacterial densities (CFU/cm<sup>2</sup>) from Study 6, right and left sides of the neck for the 12 volunteers, at each sampling time: D0 Day 0 Initial point, D0 t5h Short term sampling after 5 h, and D1, D2, D3, and D7, sampling after 1 day, 2 days, 3 days, and 7 days, respectively. Chlorhexidine (CHX) was topically applied to the left side of the neck for three days (from D0 to D2). Only the initial sampling (D0 t0) was done on the right side of the neck.
